# Supplementary material for: A Comprehensive Analysis of Codon Usage Patterns in Blunt Snout Bream (Megalobrama amblycephala) Based on RNA-Seq Data
Source: MDPI journal article supplement (doi:10.3390/ijms160611996), 2015-05-26
Supplement: s1 [file s1]

## Supplementary Information

**Table S1.** Codon usage table in *Megalobrama amblycephala*.

| AA  | Codon | NO. <sup>a</sup> | 1/1k <sup>b</sup> | RSCU <sup>c</sup> | AA  | Codon | NO. <sup>a</sup> | 1/1k <sup>b</sup> | RSCU <sup>c</sup> | AA  | Codon | NO. <sup>a</sup> | 1/1k <sup>b</sup> | RSCU <sup>c</sup> | AA  | Codon | NO. <sup>a</sup> | 1/1k <sup>b</sup> | RSCU <sup>c</sup> |
|-----|-------|------------------|-------------------|-------------------|-----|-------|------------------|-------------------|-------------------|-----|-------|------------------|-------------------|-------------------|-----|-------|------------------|-------------------|-------------------|
| Phe | UUU   | 2444             | 17.71             | 0.91              | Ser | UCU   | 2014             | 14.59             | 1.24              | Tyr | UAU   | 1707             | 12.37             | 0.85              | Cys | UGU   | 1378             | 9.99              | 1.09              |
|     | UUC   | 2918             | 21.14             | 1.09              |     | UCC   | 1812             | 13.13             | 1.11              |     | UAC   | 2328             | 16.87             | 1.15              |     | UGC   | 1157             | 8.38              | 0.91              |
| Leu | UUA   | 926              | 6.71              | 0.46              |     | UCA   | 1611             | 11.67             | 0.99              | Ter | UAA   | 240              | 1.74              | 1.11              | Ter | UGA   | 278              | 2.01              | 1.29              |
|     | UUG   | 1719             | 12.46             | 0.85              |     | UCG   | 610              | 4.42              | 0.37              |     | UAG   | 128              | 0.93              | 0.59              |     | UGG   | 1505             | 10.91             | 1.00              |
|     | CUU   | 1885             | 13.66             | 0.93              | Pro | CCU   | 1790             | 12.97             | 1.08              | His | CAU   | 1477             | 10.70             | 0.89              | Arg | CGU   | 1186             | 8.59              | 0.86              |
|     | CUC   | 2241             | 16.24             | 1.11              |     | CCC   | 1630             | 11.81             | 1.07              |     | CAC   | 1845             | 13.37             | 1.11              |     | CGC   | 1285             | 9.31              | 0.93              |
|     | CUA   | 774              | 5.61              | 0.38              |     | CCA   | 1877             | 13.60             | 1.24              | Gln | CAA   | 1565             | 11.34             | 0.52              |     | CGA   | 892              | 6.46              | 0.65              |
|     | CUG   | 4585             | 33.22             | 2.27              |     | CCG   | 779              | 5.64              | 0.51              |     | CAG   | 4495             | 32.57             | 1.48              |     | CGG   | 779              | 5.64              | 0.56              |
| Ile | AUU   | 2347             | 17.01             | 1.02              | Thr | ACU   | 1871             | 13.56             | 1.02              | Asn | AAU   | 2110             | 15.29             | 0.81              | Ser | AGU   | 1637             | 11.86             | 1.01              |
|     | AUC   | 3408             | 24.70             | 1.48              |     | ACC   | 2214             | 16.04             | 1.21              |     | AAC   | 3122             | 22.62             | 1.19              |     | AGC   | 2084             | 15.10             | 1.28              |
|     | AUA   | 1139             | 8.25              | 0.50              |     | ACA   | 2286             | 16.56             | 1.25              | Lys | AAA   | 4778             | 34.62             | 0.91              | Arg | AGA   | 2330             | 16.88             | 1.69              |
|     | AUG   | 4010             | 29.06             | 1.00              |     | ACG   | 964              | 6.99              | 0.53              |     | AAG   | 5755             | 41.70             | 1.09              |     | AGG   | 1810             | 13.12             | 1.31              |
| Met | AUG   | 4010             | 29.06             | 1.00              | Ala | GCU   | 3101             | 22.47             | 1.30              | Asp | GAU   | 3628             | 26.29             | 0.97              | Gly | GGU   | 2033             | 14.73             | 0.96              |
| Val | GUU   | 2117             | 15.34             | 0.95              |     | GCC   | 3017             | 21.86             | 1.27              |     | GAC   | 3864             | 28.00             | 1.03              |     | GGC   | 2267             | 16.43             | 1.07              |
|     | GUC   | 2193             | 15.89             | 0.99              |     | GCA   | 2344             | 16.99             | 0.98              |     | GAA   | 3592             | 26.03             | 0.72              |     | GGA   | 2887             | 20.92             | 1.36              |
|     | GUA   | 957              | 6.93              | 0.43              |     | GCG   | 1063             | 7.70              | 0.45              |     | GAG   | 6326             | 45.84             | 1.28              |     | GGG   | 1277             | 9.25              | 0.60              |
|     | GUG   | 3611             | 26.17             | 1.63              |     |       |                  |                   |                   |     |       |                  |                   |                   |     |       |                  |                   |                   |

<sup>a</sup> the number of codons in this set; <sup>b</sup> Codon frequency normalized per 1000 bases; <sup>c</sup> RSCU, relative synonymous codon usage.

**Table S2.** Basic information of ORFs of 22 vertebrates.

| Species                       | Classification | No. Raw <sup>a</sup> | No. Filter <sup>b</sup> | GC <sub>1</sub> <sup>c</sup> | GC <sub>2</sub> <sup>d</sup> | GC <sub>3</sub> <sup>e</sup> | NCG/NCC <sup>f</sup> | L <sub>sym</sub> <sup>g</sup> | GC <sub>3s</sub> <sup>h</sup> |
|-------------------------------|----------------|----------------------|-------------------------|------------------------------|------------------------------|------------------------------|----------------------|-------------------------------|-------------------------------|
| <i>Anas platyrhynchos</i>     | bird           | 16,353               | 2378                    | 0.527                        | 0.401                        | 0.508                        | 0.352                | 1,395,584                     | 0.49                          |
| <i>Bos taurus</i>             | mammal         | 22,118               | 15,384                  | 0.568                        | 0.425                        | 0.613                        | 0.337                | 7,865,724                     | 0.599                         |
| <i>Danio rerio</i>            | fish           | 43,153               | 27,662                  | 0.541                        | 0.412                        | 0.546                        | 0.437                | 14,664,501                    | 0.529                         |
| <i>Dasypus novemcinctus</i>   | mammal         | 26,551               | 14,778                  | 0.56                         | 0.423                        | 0.578                        | 0.327                | 7,762,039                     | 0.563                         |
| <i>Gadus morhua</i>           | fish           | 22,100               | 2821                    | 0.566                        | 0.412                        | 0.756                        | 0.44                 | 1,099,276                     | 0.746                         |
| <i>Gallus gallus</i>          | bird           | 16,354               | 11,726                  | 0.544                        | 0.411                        | 0.537                        | 0.375                | 6,787,730                     | 0.52                          |
| <i>Gasterosteus aculeatus</i> | fish           | 27,576               | 9239                    | 0.565                        | 0.417                        | 0.708                        | 0.499                | 4,414,263                     | 0.697                         |
| <i>Homo sapiens</i>           | mammal         | 104,763              | 63,459                  | 0.564                        | 0.427                        | 0.579                        | 0.288                | 32,166,640                    | 0.565                         |
| <i>Loxodonta africana</i>     | mammal         | 25,635               | 8608                    | 0.563                        | 0.421                        | 0.59                         | 0.283                | 4,384,775                     | 0.575                         |
| <i>Meleagris gallopavo</i>    | bird           | 16,496               | 3656                    | 0.532                        | 0.401                        | 0.509                        | 0.313                | 1,992,550                     | 0.491                         |
| <i>Mus musculus</i>           | mammal         | 52,165               | 37,773                  | 0.558                        | 0.423                        | 0.579                        | 0.281                | 19,974,206                    | 0.564                         |
| <i>Oreochromis niloticus</i>  | fish           | 26,763               | 15,238                  | 0.551                        | 0.418                        | 0.6                          | 0.366                | 8,651,545                     | 0.585                         |
| <i>Oryctolagus cuniculus</i>  | mammal         | 20,588               | 12,623                  | 0.563                        | 0.424                        | 0.608                        | 0.362                | 6,967,361                     | 0.595                         |
| <i>Oryzias latipes</i>        | fish           | 24,674               | 7939                    | 0.553                        | 0.414                        | 0.634                        | 0.416                | 3,370,200                     | 0.619                         |
| <i>Pan troglodytes</i>        | mammal         | 19,907               | 15,885                  | 0.559                        | 0.423                        | 0.568                        | 0.296                | 8,437,496                     | 0.553                         |
| <i>Pelodiscus sinensis</i>    | reptile        | 20,669               | 10,977                  | 0.527                        | 0.402                        | 0.492                        | 0.312                | 5,789,771                     | 0.473                         |
| <i>Sus scrofa</i>             | mammal         | 25,882               | 13,504                  | 0.57                         | 0.428                        | 0.612                        | 0.328                | 6,290,142                     | 0.599                         |
| <i>Taeniopygia guttata</i>    | bird           | 18,204               | 3248                    | 0.539                        | 0.405                        | 0.556                        | 0.311                | 1,656,264                     | 0.54                          |
| <i>Takifugu rubripes</i>      | fish           | 47,841               | 10,618                  | 0.559                        | 0.419                        | 0.652                        | 0.427                | 6,317,041                     | 0.639                         |
| <i>Tetraodon nigroviridis</i> | fish           | 23,118               | 7496                    | 0.565                        | 0.423                        | 0.692                        | 0.451                | 3,580,415                     | 0.68                          |
| <i>Xenopus tropicalis</i>     | amphibian      | 22,718               | 9986                    | 0.526                        | 0.401                        | 0.472                        | 0.3                  | 4,973,237                     | 0.453                         |
| <i>Xiphophorus maculatus</i>  | fish           | 20,454               | 12,805                  | 0.554                        | 0.416                        | 0.638                        | 0.478                | 6,910,273                     | 0.625                         |

<sup>a</sup> the numbers of original sequences from ORF annotation and protein annotation; <sup>b</sup> the number of full length coding sequences after filtering; <sup>c</sup> the GC content of 1st codon;

<sup>d</sup> the GC content of 2nd codon; <sup>e</sup> the GC content of 3rd codon; <sup>f</sup> the ratio of CG-end codons and CC-end codons; <sup>g</sup> the number of synonymous codons; <sup>h</sup> the GC content of 3rd synonymous codon.

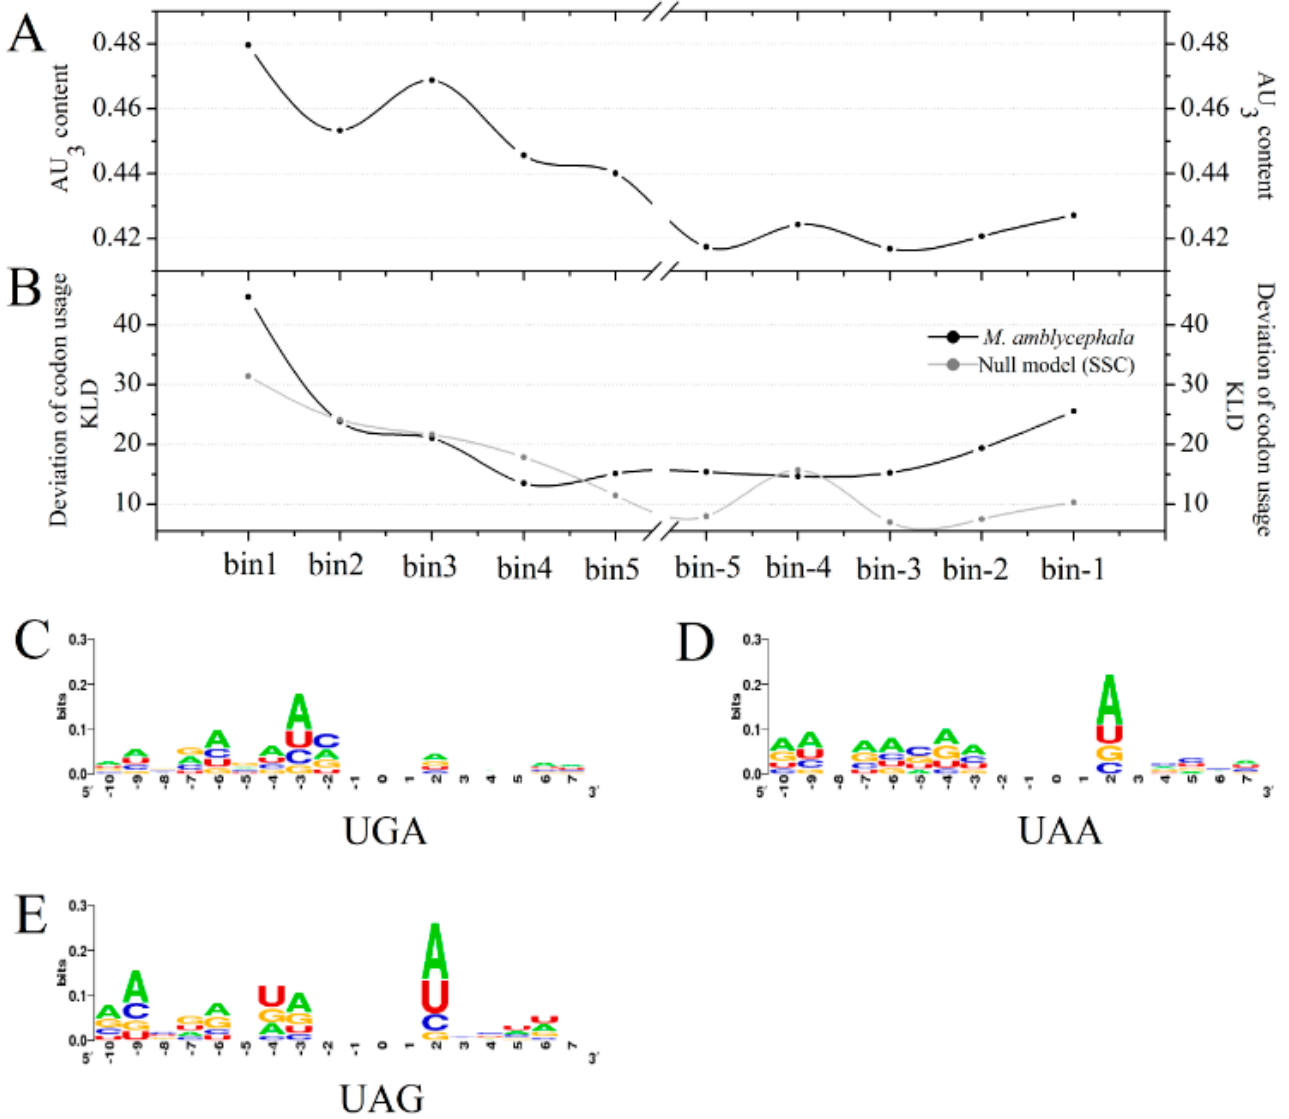

**Figure S1.** AU<sub>3</sub> value and KLD value across dependent positions and logo analyses of three stop codon contexts. (A,B) AU<sub>3</sub> value (A) and KLD value (B) are demonstrated as a function of position: 5 bins following the start codon and 5 bins before stop codons; (C–E) Logo analyses of 18 nucleotides around the UGA (C), UAA (D), UAG (E). For mapping convenience, the start and stop codons were removed from the resultant maps.

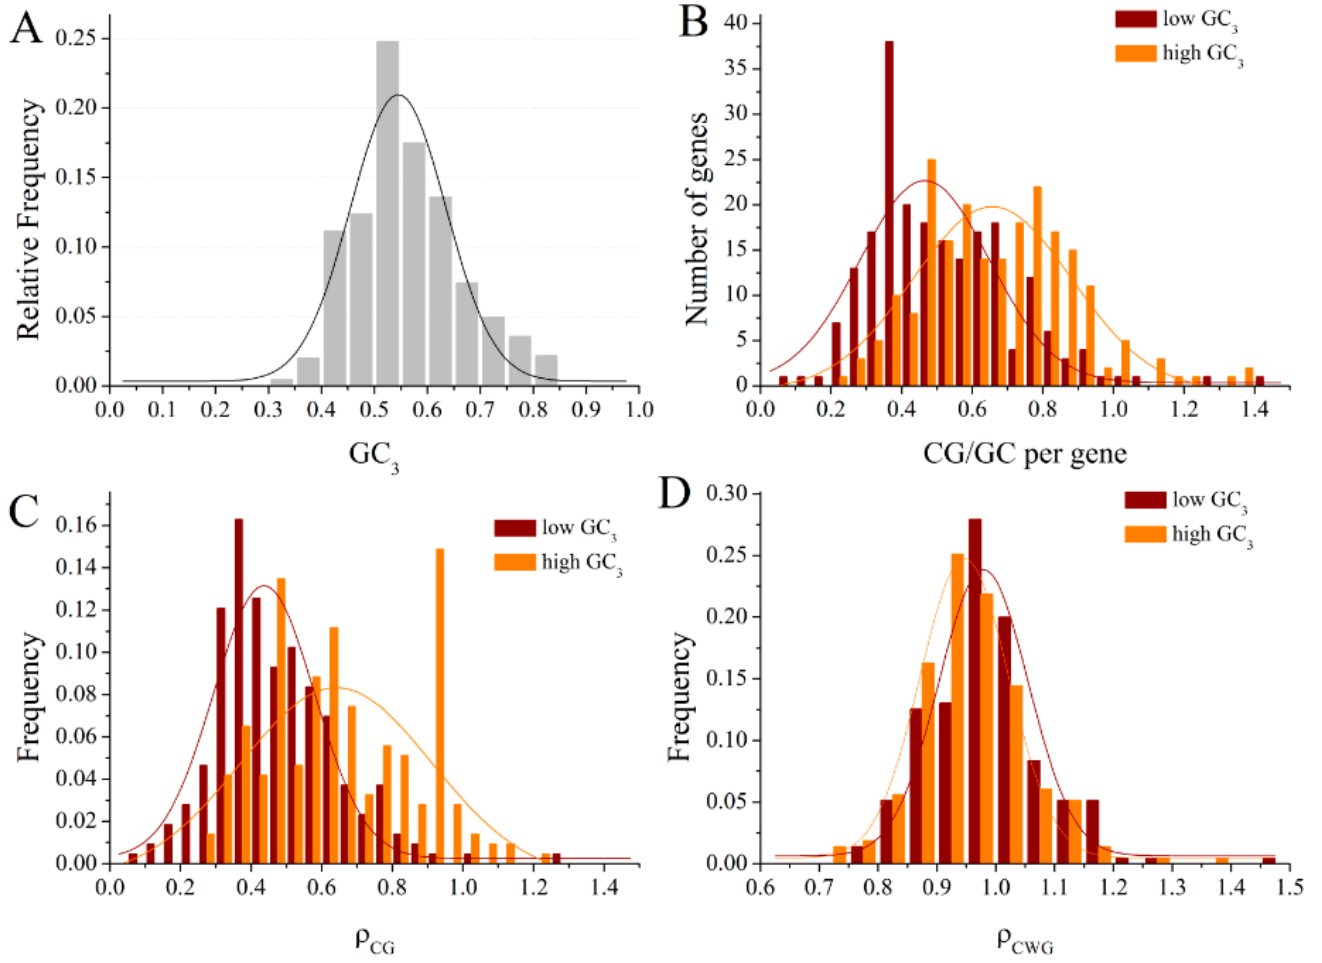

**Figure S2.** GC<sub>3</sub> distribution in *M. amblycephala* (A) and distribution of ratio of dinucleotide frequencies CG to GC (B), relative abundance of CG (C) and CWG (D) in high and low GC<sub>3</sub> groups.

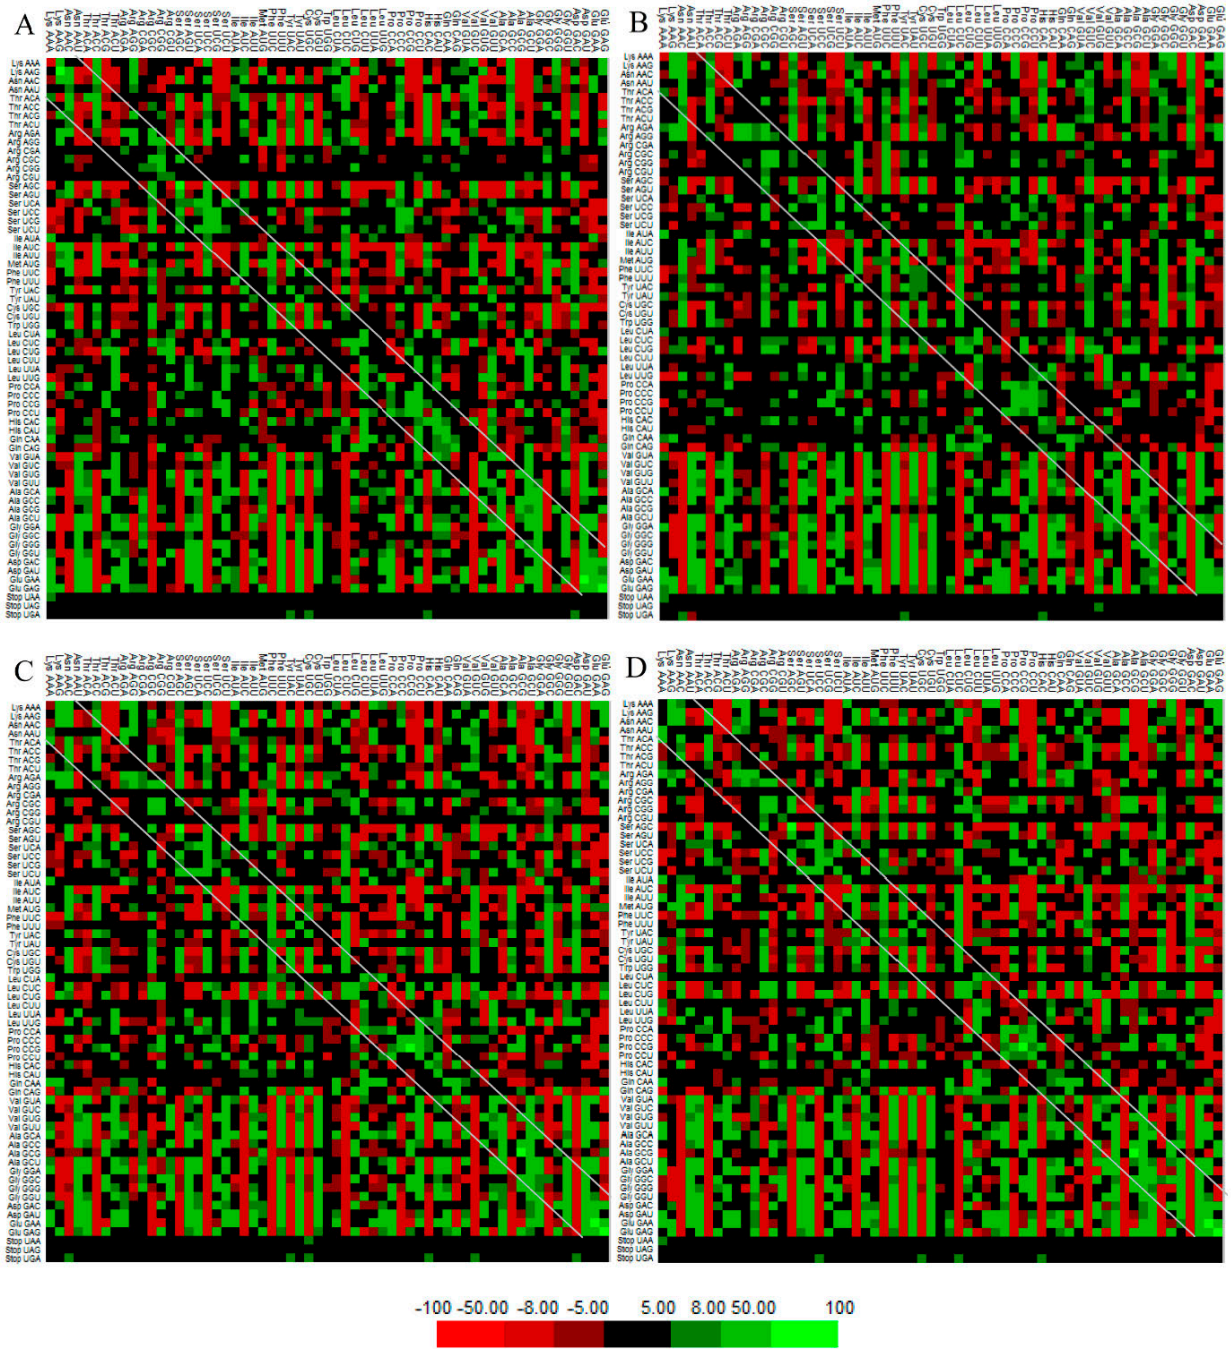Figure S3. *Cont.*

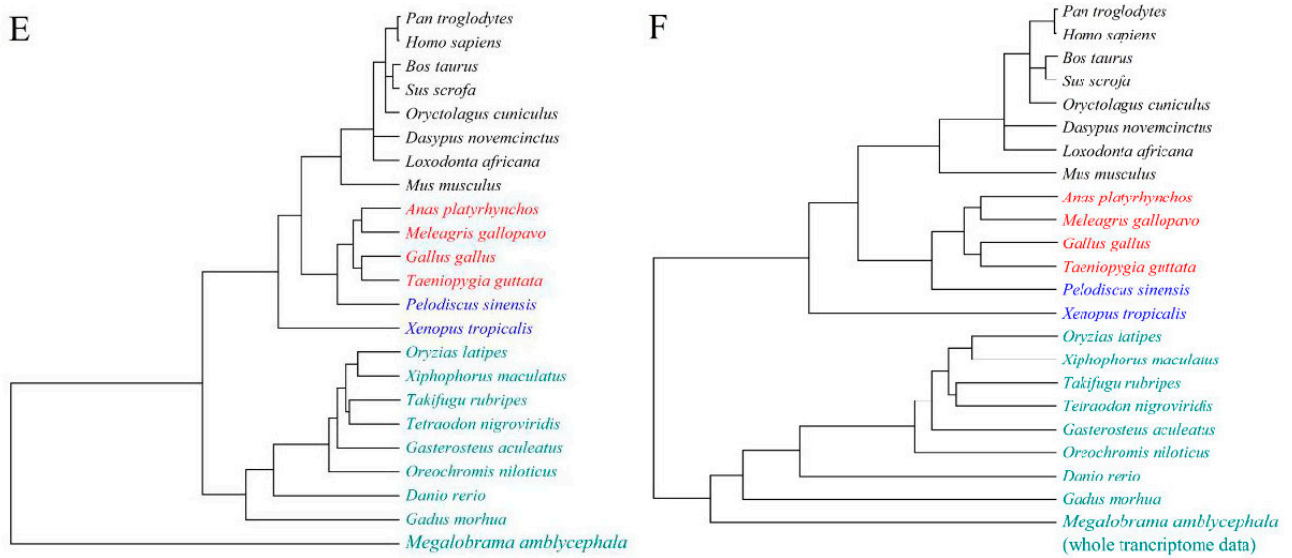

**Figure S3.** Patterns of codon context variations among 4 four vertebrate taxonomic groups and cluster analysis among 23 vertebrate species. (A–D) The cluster pattern is based on average matrix of residuals of each codon context among fishes (A), reptile together with amphibian (B), birds (C) and mammals (D), respectively. The 5' codons are in columns and the 3' codons are in rows. The green color represents highest number of the contexts and red color represents the lowest number of contexts as shown at the bottom of the A–D; (E,F) Two cluster trees depicting codon context variations among 23 vertebrate species by using full-length ORF sequences of *M. amblycephala* (E) and whole transcriptome coding sequences of *M. amblycephala* (F). Dark cyan, blue, red, black represent the fishes, reptile together with amphibian, birds and mammals, respectively.
